# Supplementary material
Source: PubMed Central journal article supplement (PMC2574557)
Supplement: NIHMS48333-supplement-1.pdf [file NIHMS48333-supplement-1.pdf]

## Supplemental Tables:

**Supplemental Table 1.** Confusion matrix for the training and small test set of the PXR dataset (20). The values in the parenthesis are for the small test set (20). The numbers in italics (docking and logistic regression) includes failed molecules.

### (a) Recursive Partitioning

|               | Activator | Non-activator |
|---------------|-----------|---------------|
| Activator     | 94 (14)   | 4 (1)         |
| Non-activator | 18        | 61            |

### (b) Random Forest

|               | Activator | Non-activator |
|---------------|-----------|---------------|
| Activator     | 81 (12)   | 17 (3)        |
| Non-activator | 30        | 49            |

### (c) Support Vector Machine

|               | Activator | Non-activator |
|---------------|-----------|---------------|
| Activator     | 97 (13)   | 1 (2)         |
| Non-activator | 9         | 70            |

### (d) Docking and logistic regression

|               | Activator | Non-activator |
|---------------|-----------|---------------|
| Activator     | 45        | 30, 53        |
| Non-activator | 43        | 29, 36        |

**Supplemental Table 2.** PXR confusion matrix analysis of the large 145 molecule test set. The numbers in italics (docking and logistic regression) includes failed molecules.

(a) Recursive Partitioning

|               | Activator | Non-activator |
|---------------|-----------|---------------|
| Activator     | 53        | 29            |
| Non-activator | 24        | 39            |

(b) Random Forest

|               | Activator | Non-activator |
|---------------|-----------|---------------|
| Activator     | 53        | 29            |
| Non-activator | 21        | 42            |

(c) Support Vector Machine

|               | Activator | Non-activator |
|---------------|-----------|---------------|
| Activator     | 56        | 26            |
| Non-activator | 22        | 41            |

(d) Docking and logistic regression

|               | Activator | Non-activator |
|---------------|-----------|---------------|
| Activator     | 58        | 21, <i>24</i> |
| Non-activator | 47        | 10, <i>16</i> |
